# Supplementary material
Source: publisher figshare collection journal article supplement (https://sage.figshare.com/ndownloader/files/12691730)
Supplement: Supplementary file 1 [file 12691730]

## Treatment History of Youth At-Risk for Serious Mental Illness

**Supplementary Table 1.** Sources of recruitment into the PROCAN study

| <b>Recruitment Source</b>          | <b>Healthy Controls<br/>(n=42)</b> | <b>Stage 0<br/>(n=41)</b> | <b>Stage 1a<br/>(n=52)</b> | <b>Stage 1b<br/>(n=108)</b> | <b>Overall<br/>(n=243)</b> |
|------------------------------------|------------------------------------|---------------------------|----------------------------|-----------------------------|----------------------------|
| Triage services for mental health* | 0.4%                               | 0.4%                      | 3.7%                       | 14.4%                       | 18.9%                      |
| Emergency/urgent care              | 0                                  | 0                         | 0                          | 1.2%                        | 1.2%                       |
| Physicians                         | 0.4%                               | 0.8%                      | 0.4%                       | 2.5%                        | 4.1%                       |
| School-based counselling services  | 0                                  | 0                         | 0                          | 2%                          | 2%                         |
| Health centers                     | 0.8%                               | 0.4%                      | 0                          | 0.8%                        | 2%                         |
| Specialized mental health services | 0                                  | 0                         | 1.2%                       | 5.4%                        | 6.6%                       |
| Self/family referrals**            | 15.7%                              | 15.3%                     | 16.1%                      | 18.1%                       | 65.2%                      |

\*A health care triage service that receives referrals from a wide range of other services requesting help for mental health issues.

\*\*self and family referrals were individuals who had seen an advert or poster or heard about our research from someone else.

**Supplementary Table 2.** Clinical staging model for mental illness

| Stage | Definition                                                                                                                                                                                                                                                                                                                                                                                                                                                                                                                                        |
|-------|---------------------------------------------------------------------------------------------------------------------------------------------------------------------------------------------------------------------------------------------------------------------------------------------------------------------------------------------------------------------------------------------------------------------------------------------------------------------------------------------------------------------------------------------------|
| 0     | <i>No clinical symptoms</i> <ul style="list-style-type: none"> <li>Increased risk of disorder due to family history</li> </ul>                                                                                                                                                                                                                                                                                                                                                                                                                    |
| 1a    | <i>Distress disorder</i> <ul style="list-style-type: none"> <li>No attenuated psychotic symptoms</li> <li>Non-specific symptoms of anxiety or depression</li> <li>Mild to moderate severity of symptoms</li> <li>May include subjective/objective evidence of mild cognitive deficits.</li> <li>Evidence of only recent or mild impacts of illness on social, educational or occupational function</li> </ul>                                                                                                                                     |
| 1b    | <i>Attenuated syndromes</i> <ul style="list-style-type: none"> <li>Distress disorder plus at least one moderate-severe attenuated psychotic symptom (unusual thoughts, suspiciousness, perceptual abnormalities, grandiosity, disorganization)</li> <li>Specific symptoms of anxiety or depression, brief hypomania or brief psychotic phenomena</li> <li>May include subjective/objective evidence of at least moderate cognitive change</li> <li>Moderate to severe impact of illness on social, education or employment functioning</li> </ul> |
| 2-4   | <i>Stages not relevant to this project</i> <ul style="list-style-type: none"> <li>Discrete episodes of psychosis, mania or severe depression</li> <li>Incomplete remission to multiple relapses</li> <li>Unremitting course of illness</li> </ul>                                                                                                                                                                                                                                                                                                 |

Adapted from McGorry, 2013<sup>7</sup> and Hickie et al., 2013<sup>8</sup>
